# Supplementary material for: Aminated polystyrene-polymaleic(anhydride) hollow microsphere membrane for fast and efficient dyes and oils filtration from water
Source: Royal Society of Chemistry journal article supplement (doi:10.1039/d2ta02218d), 2022-01-01
Supplement: d2ta02218d1.pdf [file d2ta02218d1.pdf]

## Supplementary Information

### **Aminated polystyrene-polymaleic(anhydride) hollow microspheres membrane for fast and efficient dyes and oils filtration from water**

Daikun Li, Wei Zhan, Jun Zhang, Guiyuan Cai, LiPin Li, Qinyu Wang, Yu Tian\*

*State Key Laboratory of Urban Water Resource and Environment (SKLUWRE),*

*School of Environment, Harbin Institute of Technology, Harbin, 150090, China.*

\*Corresponding author at: No.73, Huanghe Road, Nangang District, Harbin City,  
Heilongjiang Province, China.

E-mail addresses: [hitzhanwei@hit.edu.cn](mailto:hitzhanwei@hit.edu.cn) (Wei Zhan)

---

## 1. Adsorption Isotherm

The experimental details are as follows: 5 mg of PSMM-NH<sub>2</sub> is added into 50 mL of dye solution of different concentrations (30-150 mg·L<sup>-1</sup>) at pH 3, and the mixture is shaken (200 rpm) at 25°C and 50°C for 12 hours, ensuring the adsorption reaches equilibrium.

Langmuir and Freundlich are applied to describe the equilibrium adsorption performance of AR on the PSMM-NH<sub>2</sub> microspheres. The Langmuir isotherm is based on the assumptions of monolayer and uniform adsorption process, and limited adsorption sites. Freundlich model is used to describe the adsorption interaction on a heterogeneous surface.<sup>1</sup> Langmuir and Freundlich isotherms are expressed as Formula S 1 and S2 respectively:

$$\frac{c_e}{q_e} = \frac{1}{bq_m} + \frac{c_e}{q_m} \quad (\text{S1})$$

$$\ln q_e = \ln K_F + \frac{1}{n} \ln c_e \quad (\text{S2})$$

where  $c_e$  (mg·L<sup>-1</sup>) represents the equilibrium concentration of AR in the solution,  $q_e$  and  $q_m$  (mg·g<sup>-1</sup>) are the equilibrium and monolayer concentration of AR on PSMM-NH<sub>2</sub> microspheres, respectively.  $b$  (L·mg<sup>-1</sup>) represents the Langmuir affinity parameter.  $K_F$  (L·mg<sup>-1</sup>) and  $n$  are the Freundlich isotherm constant and the adsorption intensity, respectively.

Moreover, Langmuir isotherm can be expressed by a dimensionless equilibrium parameter  $R_L$ :<sup>2</sup>

$$R_L = \frac{1}{1 + bc_o} \quad (\text{S3})$$

where  $c_o$  is the initial concentration of AR in the solution, and the  $R_L$  is the type of isotherm, unfavorable ( $R_L > 1$ ), linear ( $R_L = 1$ ), favorable ( $0 < R_L < 1$ ) or irreversible ( $R_L = 0$ ).

Fig. S5a shows the relationship between equilibrium concentration and adsorption

---

capacity. The linear fittings of isotherms according to experimental data are exhibited in Fig. S5b and c, respectively. Obviously, the fits of AR adsorption on PSMM-NH<sub>2</sub> microspheres at different temperature is more in line with the Langmuir isotherm. The corresponding isotherms parameters are summarized in Table S1, and the determination coefficients  $R^2$  of the Langmuir isotherm of PSMM-NH<sub>2</sub> exceed 0.99, which is significantly greater than the Freundlich isotherm, indicating that Langmuir isotherm model can description of the adsorption process well and the adsorption of AR to PSMM-NH<sub>2</sub> microspheres is monolayer in nature and the adsorption sites is homogeneous distribution. In addition, the dimensionless equilibrium parameters  $R_L$  are between 0 and 1, demonstrating the adsorption is favorable.

## 2. Adsorption Kinetic study

In this paper, two widely used adsorption kinetic models, pseudo-first-order and pseudo-second-order are used to study the adsorption of AR to PSMM-NH<sub>2</sub> microspheres. Their linear expressions correspond to Equations S4 and Equations S5 respectively.<sup>3</sup>

$$\ln(q_e - q_t) = \ln q_e - k_1 t \quad (\text{S4})$$

$$\frac{t}{q_t} = \frac{1}{k_2 q_e^2} + \frac{t}{q_e} \quad (\text{S5})$$

where  $q_t$  (mg·g<sup>-1</sup>) is the adsorption capacity at time  $t$  (min),  $k_1$  and  $k_2$  (g·mg<sup>-1</sup>·min<sup>-1</sup>) are the rate constant of the pseudo-first-order and pseudo-second-order models, respectively.

The influence of time on adsorption amount of AR to PSMM-NH<sub>2</sub> microspheres is exhibited in Fig. S5d. PSMM-NH<sub>2</sub> has extremely fast adsorption rate and the adsorption reaches equilibrium within 10 minutes. Linear fittings of the pseudo-first-order and pseudo-second-order kinetic of AR adsorption to PSMM-NH<sub>2</sub> is shown in

Fig. S5e,f respectively, and the kinetic parameters are summarized in Table S2. Obviously, the adsorption of AR to PSMM-NH<sub>2</sub> fits well with the pseudo-second-order kinetic, indicating that the adsorption is controlled by the chemical adsorption mechanism.

### 3. Supplementary figures

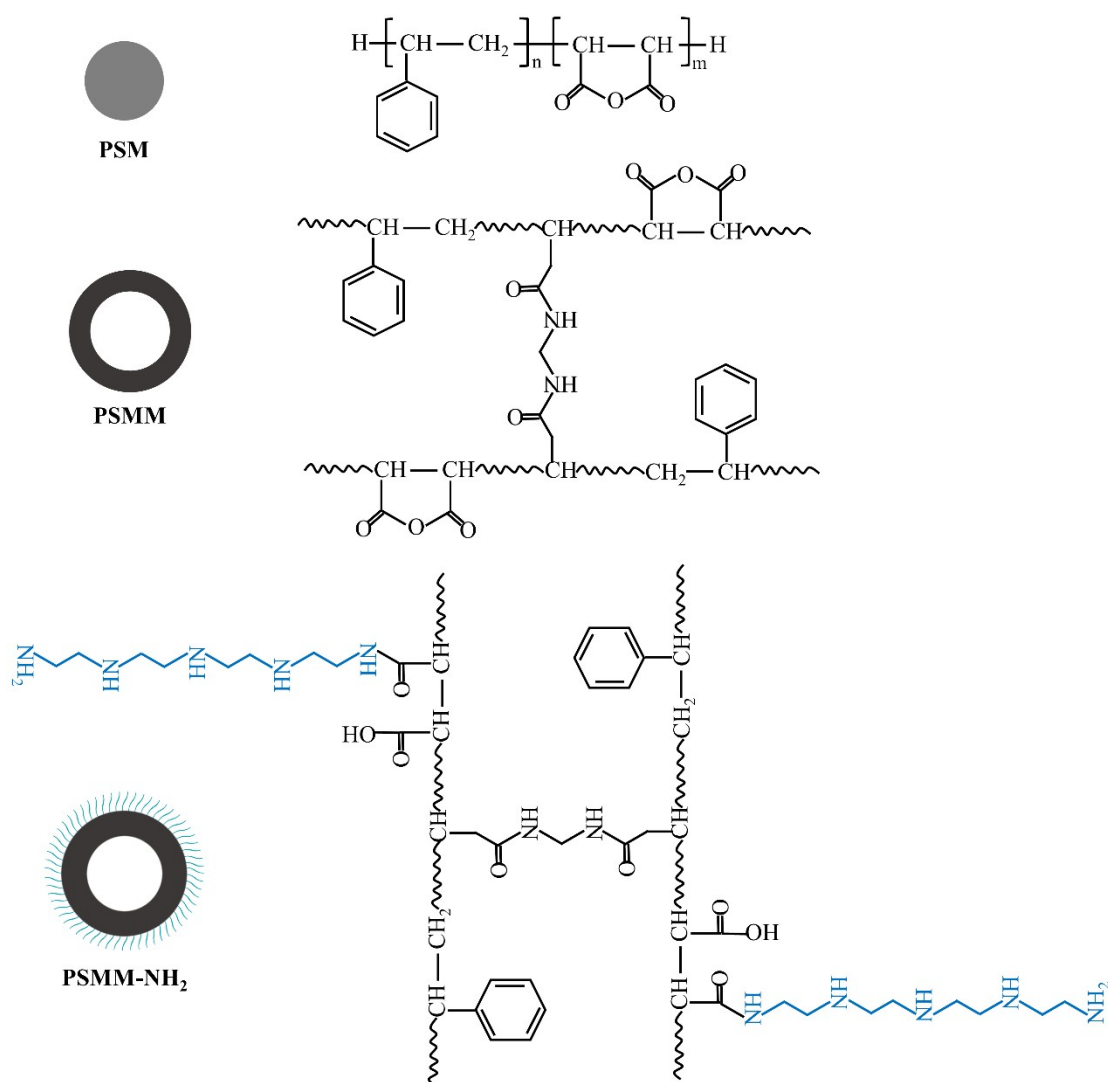

**Fig. S1** Chemical structures of PSM, PSMM and PSMM-NH<sub>2</sub>

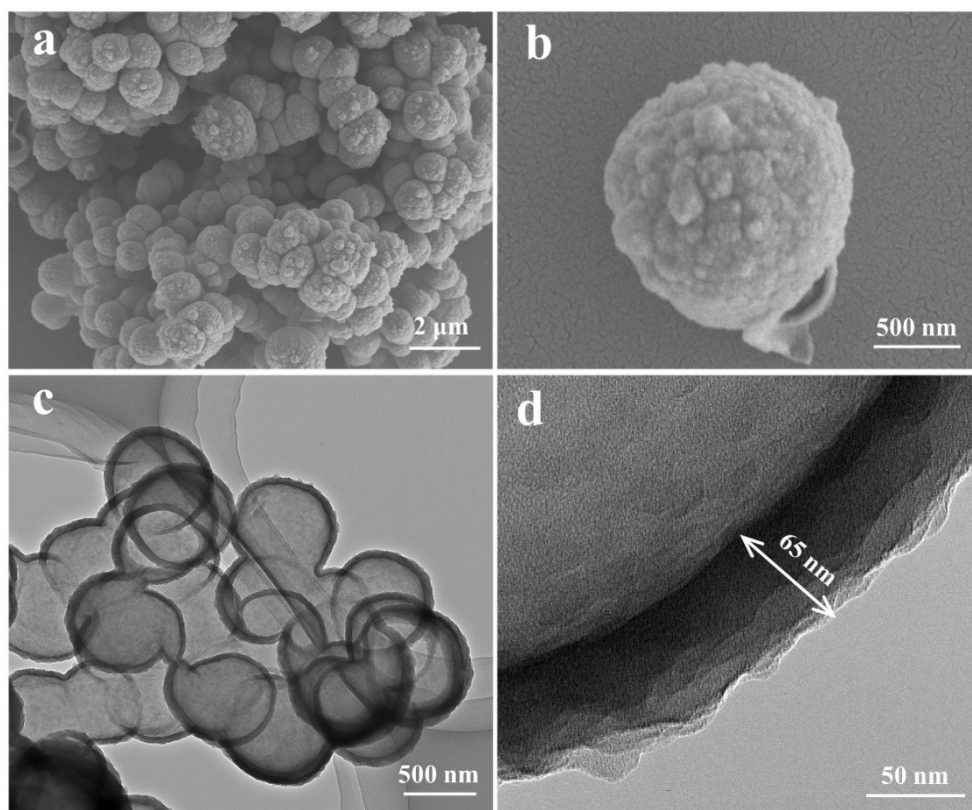

**Fig. S2** (a, b) SEM and (c, d) TEM images of PSMM microspheres

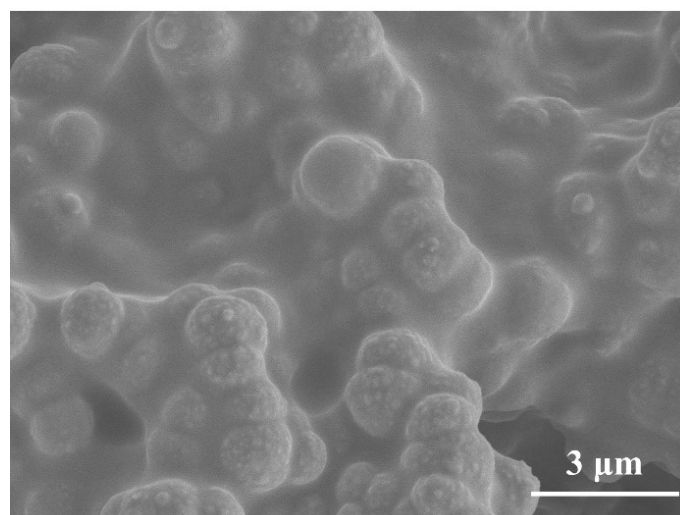

**Fig. S3** SEM image of PSMM microspheres grafted with polyethyleneimine

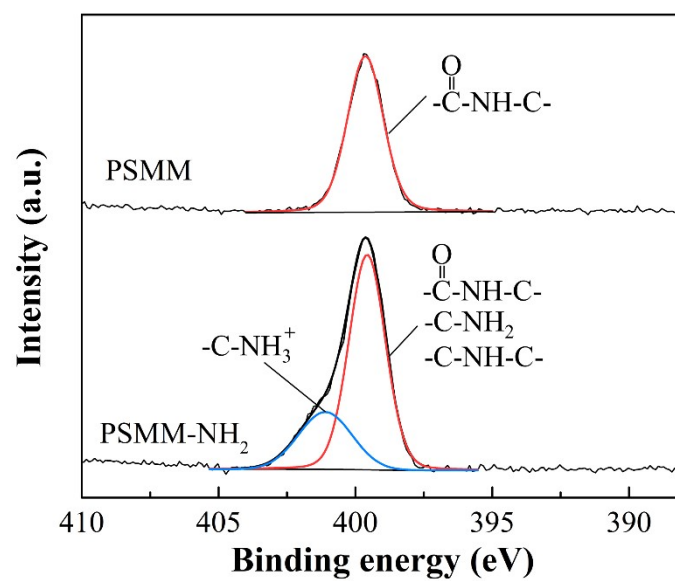

**Fig. S4** XPS N1s spectra of PSMM and PSMM-NH<sub>2</sub>

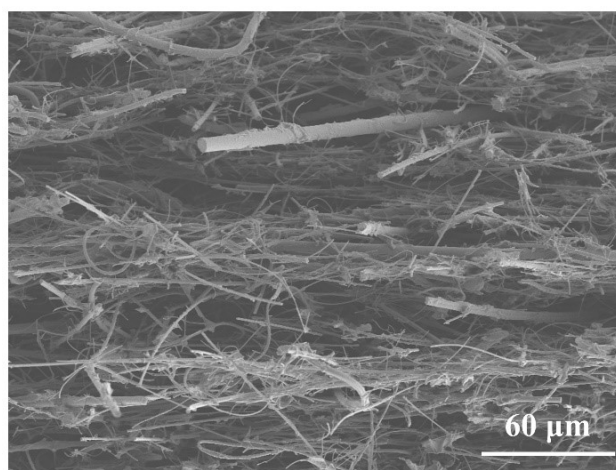

**Fig. S5** SEM image of fiberglass membrane

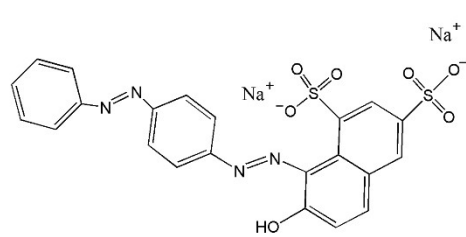

**Acid Red 73**

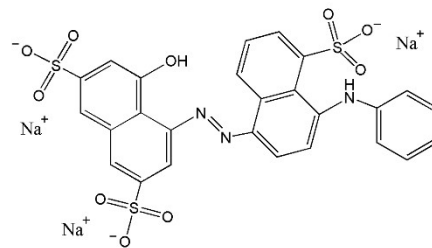

**Acid Blue 92**

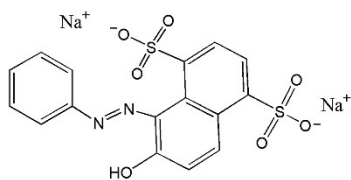

**Acid Orange G**

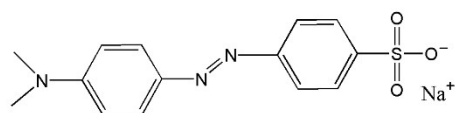

**Methyl Orange**

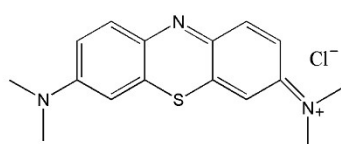

**Methylene blue**

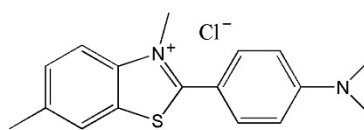

**Thioflavin T**

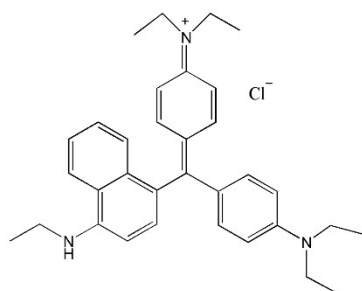

**Basic Blue 7**

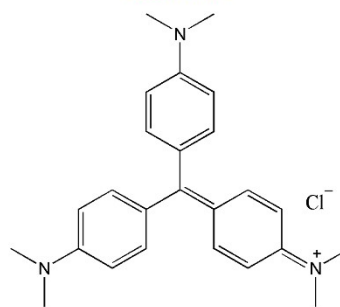

**Crystal violet**

**Fig. S6** The molecular structure of dyes used in this paper

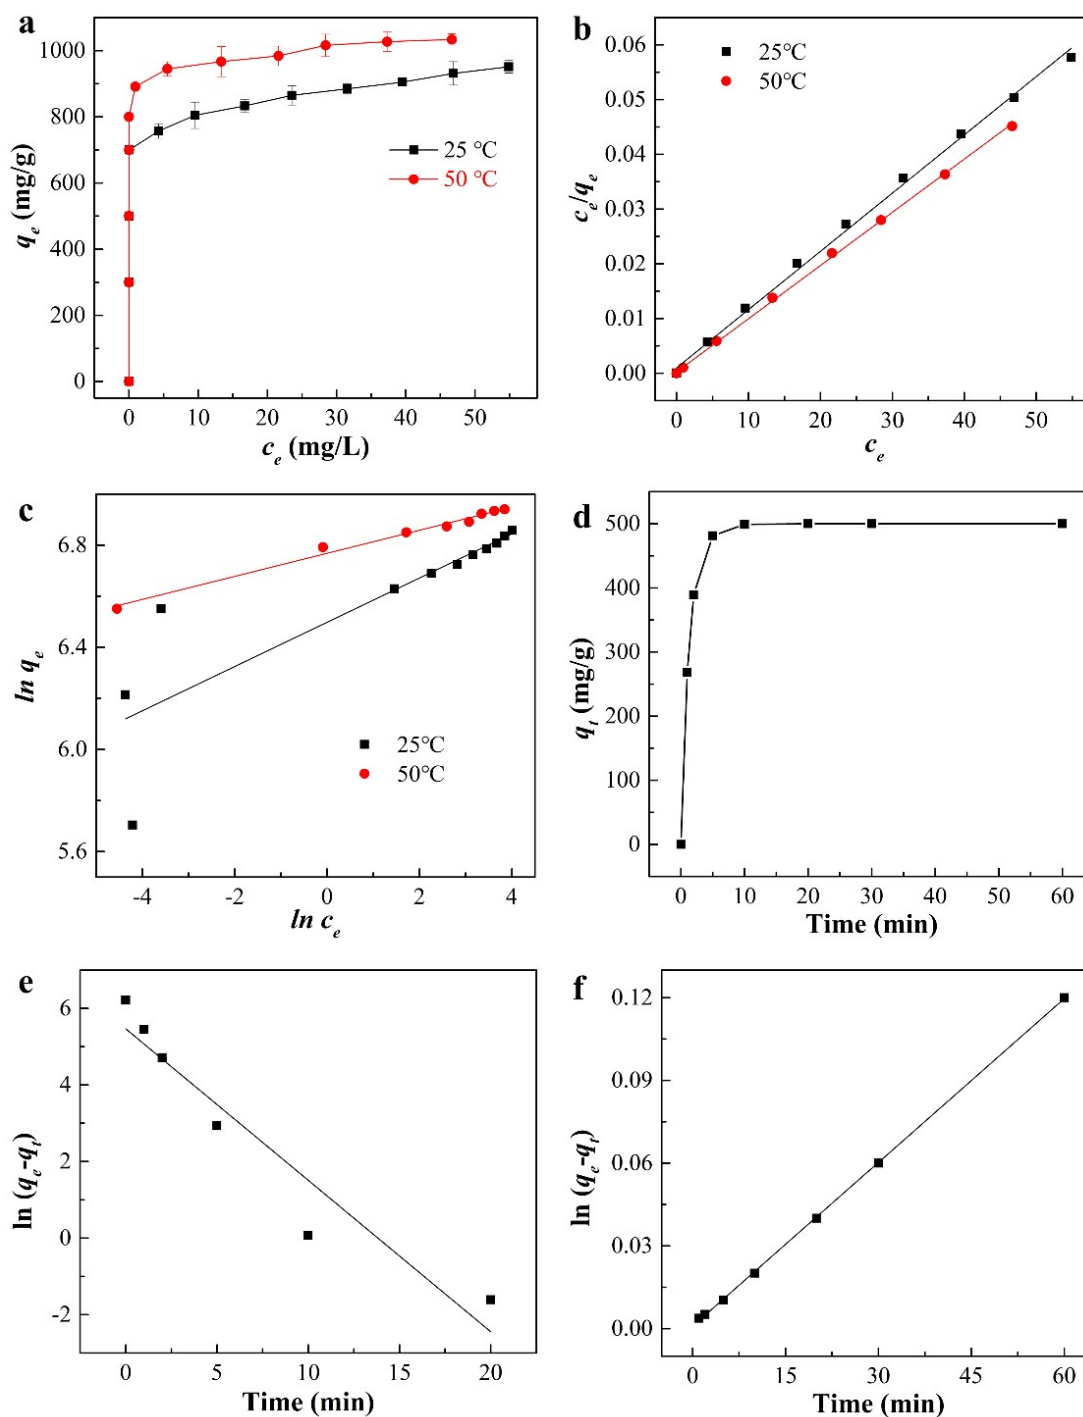

**Fig. S7** (a) Equilibrium adsorption experiment of AR on PSMM-NH<sub>2</sub>. (b) and (c) are the linear fittings of Langmuir and Freundlich Isotherms respectively. (d) Changes of the adsorption capacity of AR on PSMM-NH<sub>2</sub> with time. (e) Pseudo-first-order model and (f) pseudo-second-order model for AR on PSMM-NH<sub>2</sub>.



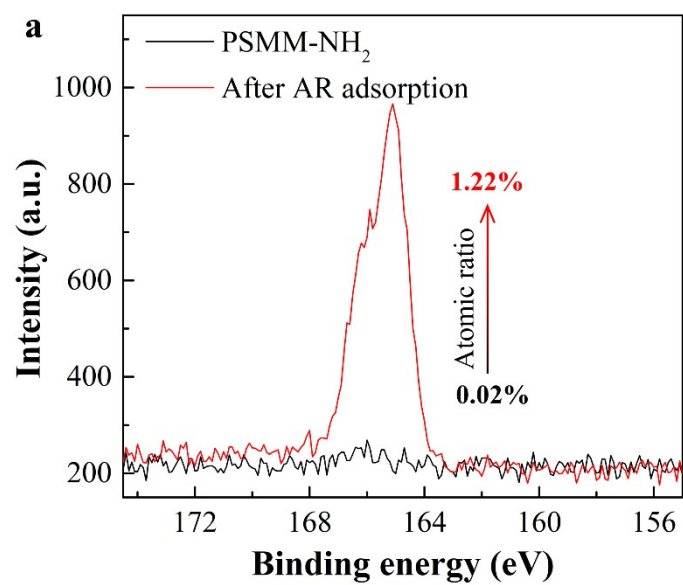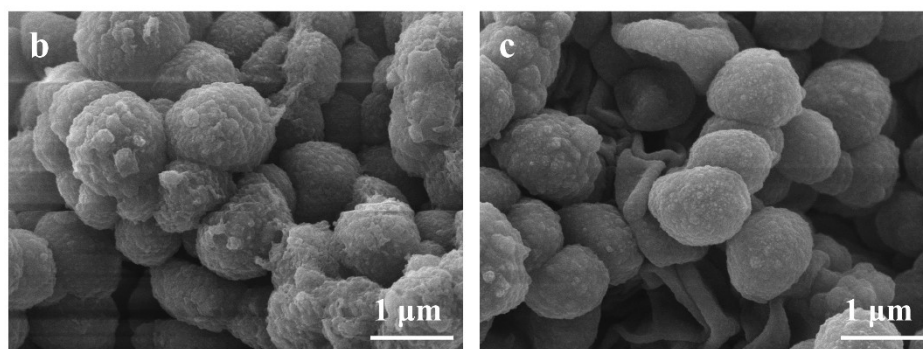

**Fig. S8** (a) XPS S<sub>p2</sub> spectra of PSMM-NH<sub>2</sub> before and after AR adsorption. (b) SEM image of AR adsorbed PSMM-NH<sub>2</sub>. (c) SEM image of PSMM-NH<sub>2</sub> after five AR adsorption-desorption cycles.

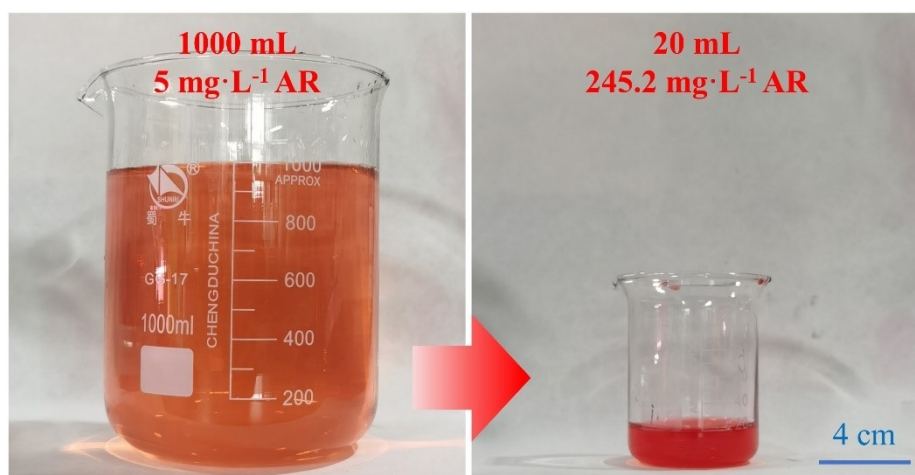

**Fig. S9** The adsorption-desorption of PSMM-NH<sub>2</sub> to achieve concentration of AR solution. (Experimental details: 5 mg PSMM-NH<sub>2</sub> is added into 1000 ml AR solution (5 mg·L<sup>-1</sup>, pH=3). After stirring and adsorbing for 30 min, the solid was collected by pump filtering. The AR adsorbed PSMM-NH<sub>2</sub> was added into 10 ml water (pH=12) and desorbed for 30 minutes. Then the mixture was centrifuged (4000 rpm, 5 min) to collect the solid, and the solid was added into 10 ml pH 12 water to desorbed again. After that, solid and liquid were separated by centrifuging. The two desorbed solutions were mixed to obtain 20 mL of concentrated AR solution.)

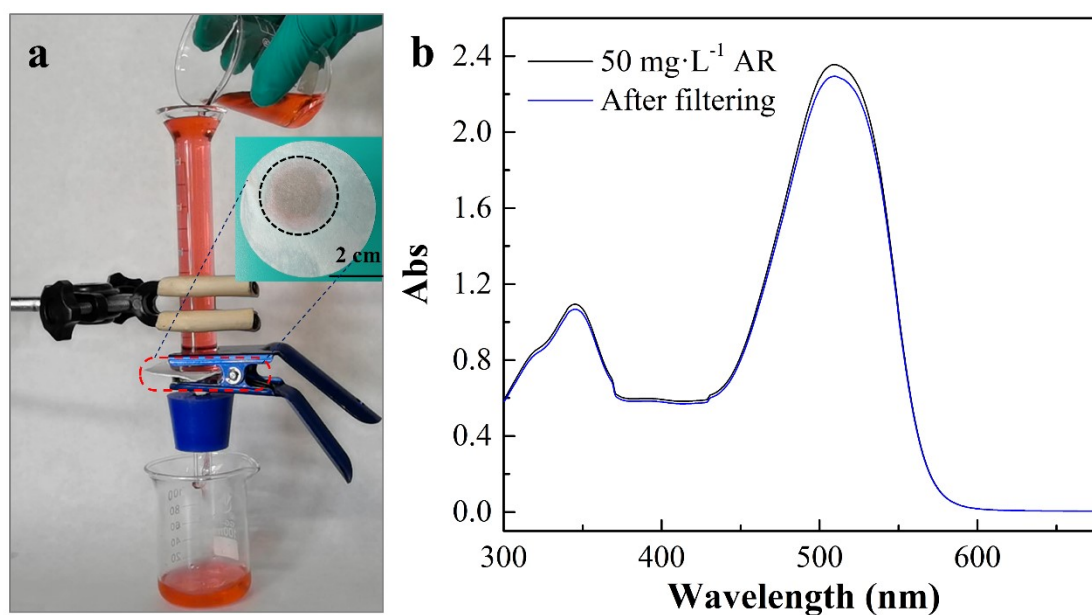

**Fig. S10** AR filtration test for fiberglass membrane (pH=3)

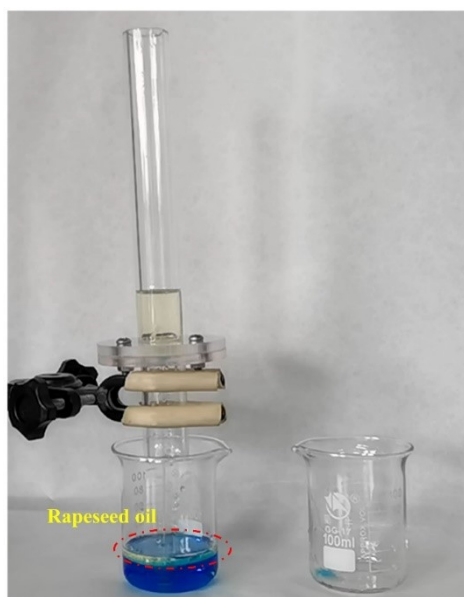

**Fig. S11** Oil-water separation test of ordinary glass fiber membrane

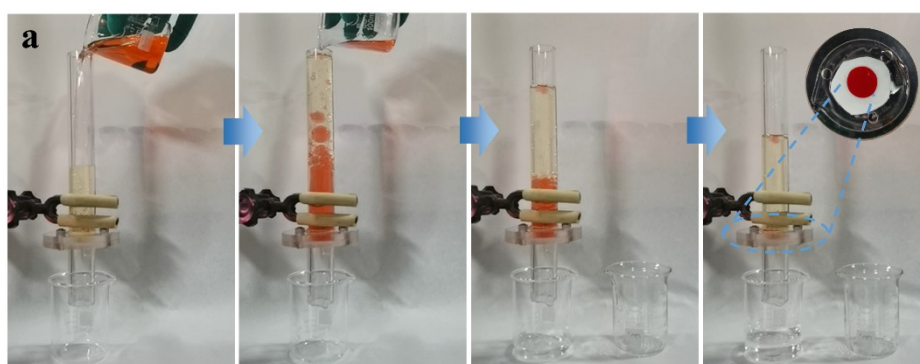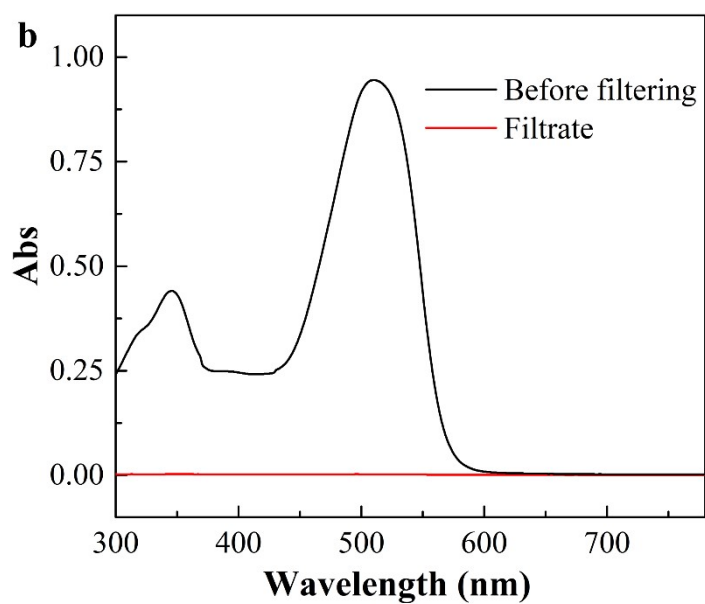

**Fig. S12** (a) The dynamic images of separation process of rapeseed oil/AR solution ( $20 \text{ mg}\cdot\text{L}^{-1}$ ; inset: PSMM-NH<sub>2</sub> membrane after filtration). (b) The UV-vis spectra of AR solution before and after filtration

---

## 4. Supplementary tables

**Table S1** Isotherm parameters of the AR adsorption on PSMM-NH<sub>2</sub>

| Temperature | $q_{mx, exp}$ | Langmuir |        |                     |        | Freundlich |        |        |
|-------------|---------------|----------|--------|---------------------|--------|------------|--------|--------|
|             |               | $q_m$    | $b$    | $R_L$               | $R^2$  | $k_F$      | $1/n$  | $R^2$  |
| 25°C        | 951.1         | 943.4    | 1.0836 | 0.00611-<br>0.0298  | 0.9973 | 663.8      | 0.0867 | 0.6986 |
| 50°C        | 1033.4        | 1028.5   | 4.1532 | 0.00160-<br>0.00796 | 0.9994 | 869.7      | 0.0452 | 0.9864 |

**Table S2** Kinetic parameters of the AR adsorption on PSMM-NH<sub>2</sub>

| $q_{e, exp}$ | Pseudo-first-order |        |        | Pseudo-second-order |                       |        |
|--------------|--------------------|--------|--------|---------------------|-----------------------|--------|
|              | $q_e$              | $k_1$  | $R^2$  | $q_e$               | $k_2$                 | $R^2$  |
| 500.0        | 236.7              | 0.3956 | 0.9037 | 505.1               | $4.76 \times 10^{-3}$ | 0.9998 |

---

## 5. Supplementary references

1. R. Xu, G. Zhou, Y. Tang, L. Chu, C. Liu, Z. Zeng and S. Luo, *Chem. Eng. J.*, 2015, **275**, 179.
2. S. Parvin, B. K. Biswas, M. A. Rahman, M. H. Rahman, M. S. Anik and M. R. Uddin, *Chemosphere*, 2019, **236**, 124326.
3. D. Li, Q. Li, N. Bai, H. Dong and D. Mao, *ACS Sustain. Chem. Eng.*, 2017, **5**, 5598.
